# Supplementary material for: Unveiling the culturable Bacillus sp. from honey in Burkina Faso as a potential source for antimicrobial peptides in plant disease control
Source: Research Square preprint supplement (doi:10.21203/rs.3.rs-7280305/v1), 2025-08-22
Supplement: Supplementary file 1 [file 42f66cd359300f5aa8515366.docx]

**Supporting information – Raw images**

**Unveiling the culturable *Bacillus* sp. from honey in Burkina Faso as a potential source for antimicrobial peptides in plant disease control**

**Figures containing gels and blot images**


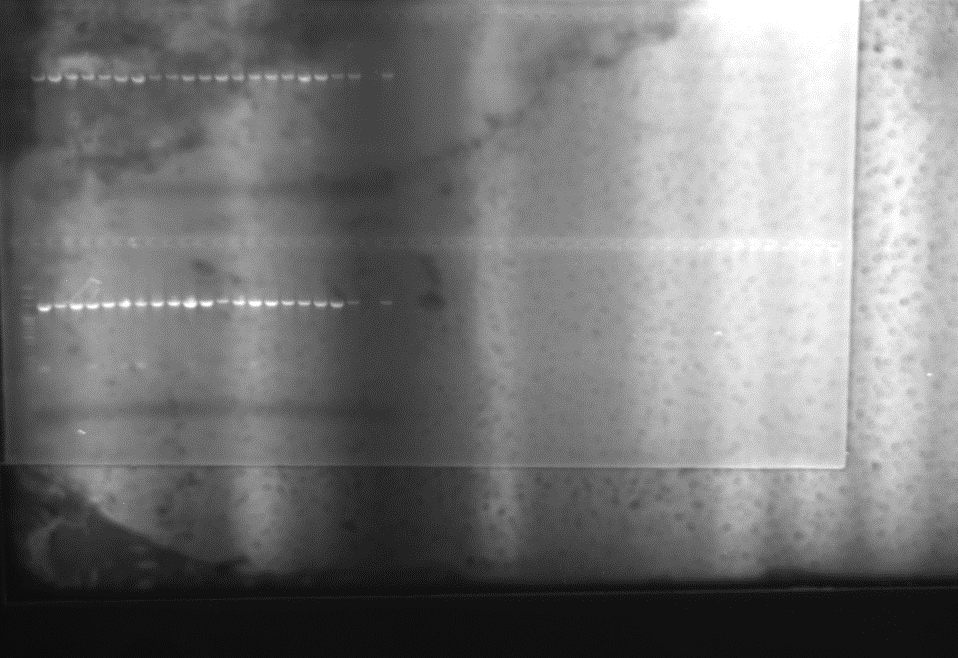


MPM 10 11 12 14 15 18 21 22 21 28 29 31 33 34 35 38

**Figure 1:** PCR-amplified fragments on 2% agarose gel of *Bacillus* sp. strains using *16S DNA primers*


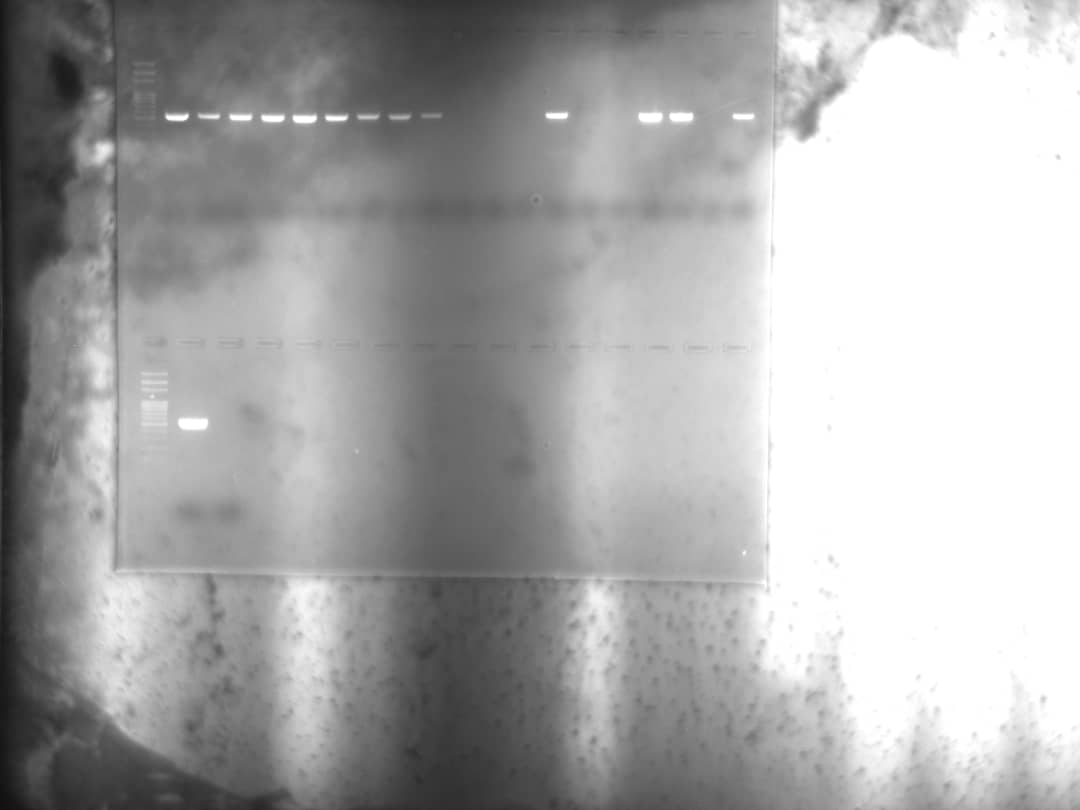

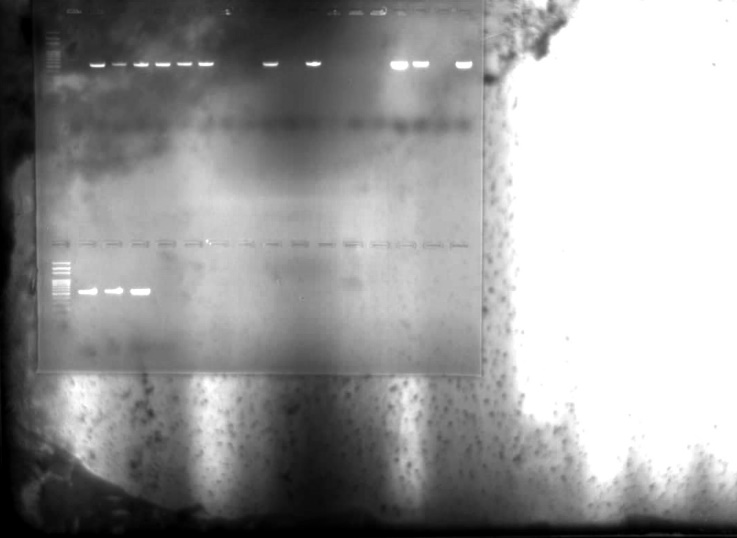


MPM 40

MPM 22 23 24 25 26 27 30 32 36 37 39

MPM 1 2 3 4 5 6 7 8 9 13 16 17 19

MPM 20

**Figure 2 :** PCR-amplified fragments on 2% agarose gel of *B. cereus* isolated from honey

**Table 1: Size of detected gene after DNA fragments amplification**

| **Strains** | **Code** | ***Bacillus cereu*s** | **ituA** | **hag** | **tasA** | **srf** | **spaS** | **mrsA** |
| --- | --- | --- | --- | --- | --- | --- | --- | --- |
| BH1.0 | 1 | 621 | 0 | 0 | 0 | 0 | 0 | 0 |
| BH1.1 | 2 | 621 | 0 | 0 | 0 | 0 | 0 | 0 |
| BH1.2 | 3 | 621 | 0 | 0 | 0 | 0 | 0 | 0 |
| BH2.0 | 4 | 621 | 743 | 700 | 719 | 0 | 0 | 7 |
| BH2.1 | 5 | 621 | 0 | 0 | 0 |  | 0 | 0 |
| BH2.2 | 6 | 621 | 0 | 0 | 0 | 743 | 0 | 0 |
| HT3.0 | 7 | 621 | 0 | 0 | 0 | 0 | 0 | 0 |
| HT3.1 | 8 | 621 | 0 | 0 | 0 | 0 | 0 | 0 |
| HT3.2 | 9 | 621 | 0 | 0 | 0 | 0 | 0 | 0 |
| HT4.0 | 10 | 0 | 743 | 700 | 0 | 743 | 0 | 0 |
| HT4.1 | 11 | 0 | 743 | 700 | 719 | 743 | 0 | 707 |
| HT4.2 | 12 | 0 | 743 | 700 | 719 | 0 | 0 | 0 |
| HT5.0 | 13 | 621 | 0 | 0 | 719 | 743 | 0 | 0 |
| HT5.1 | 14 | 0 | 743 | 700 | 0 | 0 | 0 | 0 |
| HT5.2 | 15 | 0 | 743 | 700 | 719 | 743 | 0 | 0 |
| BT6.0 | 16 | 621 | 0 | 0 | 719 | 0 | 0 | 0 |
| BT6.1 | 17 | 621 | 0 | 700 | 0 | 0 | 0 | 0 |
| BT6.2 | 18 | 0 | 0 | 0 | 0 | 743 | 0 | 0 |
| BT7.0 | 19 | 621 | 0 | 0 | 0 | 0 | 0 | 0 |
| BT7.1 | 20 | 621 | 743 | 0 | 0 | 0 | 0 | 0 |
| BT7.2 | 21 | 0 | 743 | 0 | 0 | 0 | 0 | 0 |
| BT8.0 | 22 | 621 | 0 | 700 | 0 | 0 | 0 | 707 |
| BT8.1 | 23 | 621 | 0 | 700 | 719 | 0 | 0 | 0 |
| BT8.2 | 24 | 621 | 0 | 0 | 719 | 0 | 0 | 0 |
| BT8.3 | 25 | 621 | 0 | 0 | 719 | 0 | 0 | 0 |
| OK9.0 | 26 | 621 | 0 | 0 | 0 | 0 | 0 | 0 |
| OK9.1 | 27 | 621 | 743 | 0 | 0 | 0 | 0 | 0 |
| OK9.2 | 28 | 0 | 0 | 0 | 0 | 0 | 0 | 707 |
| OK9.3 | 29 | 0 | 743 | 700 | 0 | 0 | 0 | 0 |
| OK10.0 | 30 | 621 | 0 | 0 | 0 | 0 | 0 | 0 |
| OK10.1 | 31 | 0 | 0 | 700 | 719 | 743 | 0 | 0 |
| OK10.2 | 32 | 621 | 0 |  | 0 | 0 | 0 | 707 |
| OK10.3 | 33 | 0 | 743 | 700 | 719 | 0 | 0 | 707 |
| KK11.0 | 34 | 0 |  |  | 0 | 0 | 0 | 0 |
| KK11.1 | 35 | 0 | 743 | 700 | 0 | 0 | 0 | 0 |
| KK11.2 | 36 | 621 | 0 | 0 | 0 | 0 | 0 | 0 |
| KK11.3 | 37 | 621 | 0 | 0 | 719 | 743 | 0 | 0 |
| KK12.0 | 38 | 0 | 0 | 0 | 0 | 0 | 0 | 707 |
| KK12.1 | 39 | 621 | 0 | 0 | 0 | 0 | 0 | 707 |
| KK12.2 | 40 | 621 | 0 | 0 | 0 | 0 | 0 | 0 |
